# Supplementary material for: Cross-Geographic Validation Demonstrates Universal Transcriptomic Signatures for Tuberculosis Diagnosis: A Machine Learning Study
Source: Research Square preprint supplement (doi:10.21203/rs.3.rs-8445596/v1), 2025-12-31
Supplement: Supplementary file 1 [file 3db83837eb94da23643d9d86.docx]

Supplementary Materials

**Cross-Geographic Validation Demonstrates Universal Transcriptomic Signatures for Tuberculosis Diagnosis: A Machine Learning Study**

Siddalingaiah H S.

# Table of Contents

1. Supplementary Methods........................................................................... 2
2. Supplementary Results............................................................................. 4
3. Supplementary Figures............................................................................. 5
4. Supplementary Tables.............................................................................. 7

# 1. Supplementary Methods

## 1.1 Data Preprocessing Pipeline

Raw count matrices were downloaded from NCBI GEO. Processing steps included:

- Quality control: Samples with <1 million reads were excluded.
- Normalization: Counts per Million (CPM) normalization was applied using the edgeR package logic.
- Transformation: Log2(CPM + 1) transformation was applied to stabilize variance.
- Alignment: Only genes present in both datasets (39,376 genes) were retained. Genes were matched by valid HUGO symbols.

## 1.2 Machine Learning Implementation

The Random Forest algorithm was implemented using Python (scikit-learn v1.0). No feature selection was performed prior to training to test the robustness of the algorithm to high-dimensional noise. The 'balanced' class weight parameter was essential to handle class imbalance in the training set.

# 2. Supplementary Results

## 2.1 Batch Effect Assessment

To ensure that differences in sequencing platforms (Illumina HiSeq vs NextSeq) did not drive classification, we performed Principal Component Analysis (PCA) on the combined dataset. As shown in Figure S2, samples clustered primarily by disease status (Active TB vs LTBI) rather than by cohort origin. Use of Z-score standardization based on training set statistics further mitigated technical variation.

## 2.2 Full Performance Metrics

In addition to AUC, we evaluated sensitivity and specificity at the optimal Youden's index threshold derived from the London training set. The model maintained high sensitivity (89.3%) essential for triage testing, while achieving unexpectedly high specificity (93.8%) in the endemic validation setting.

# 3. Supplementary Figures


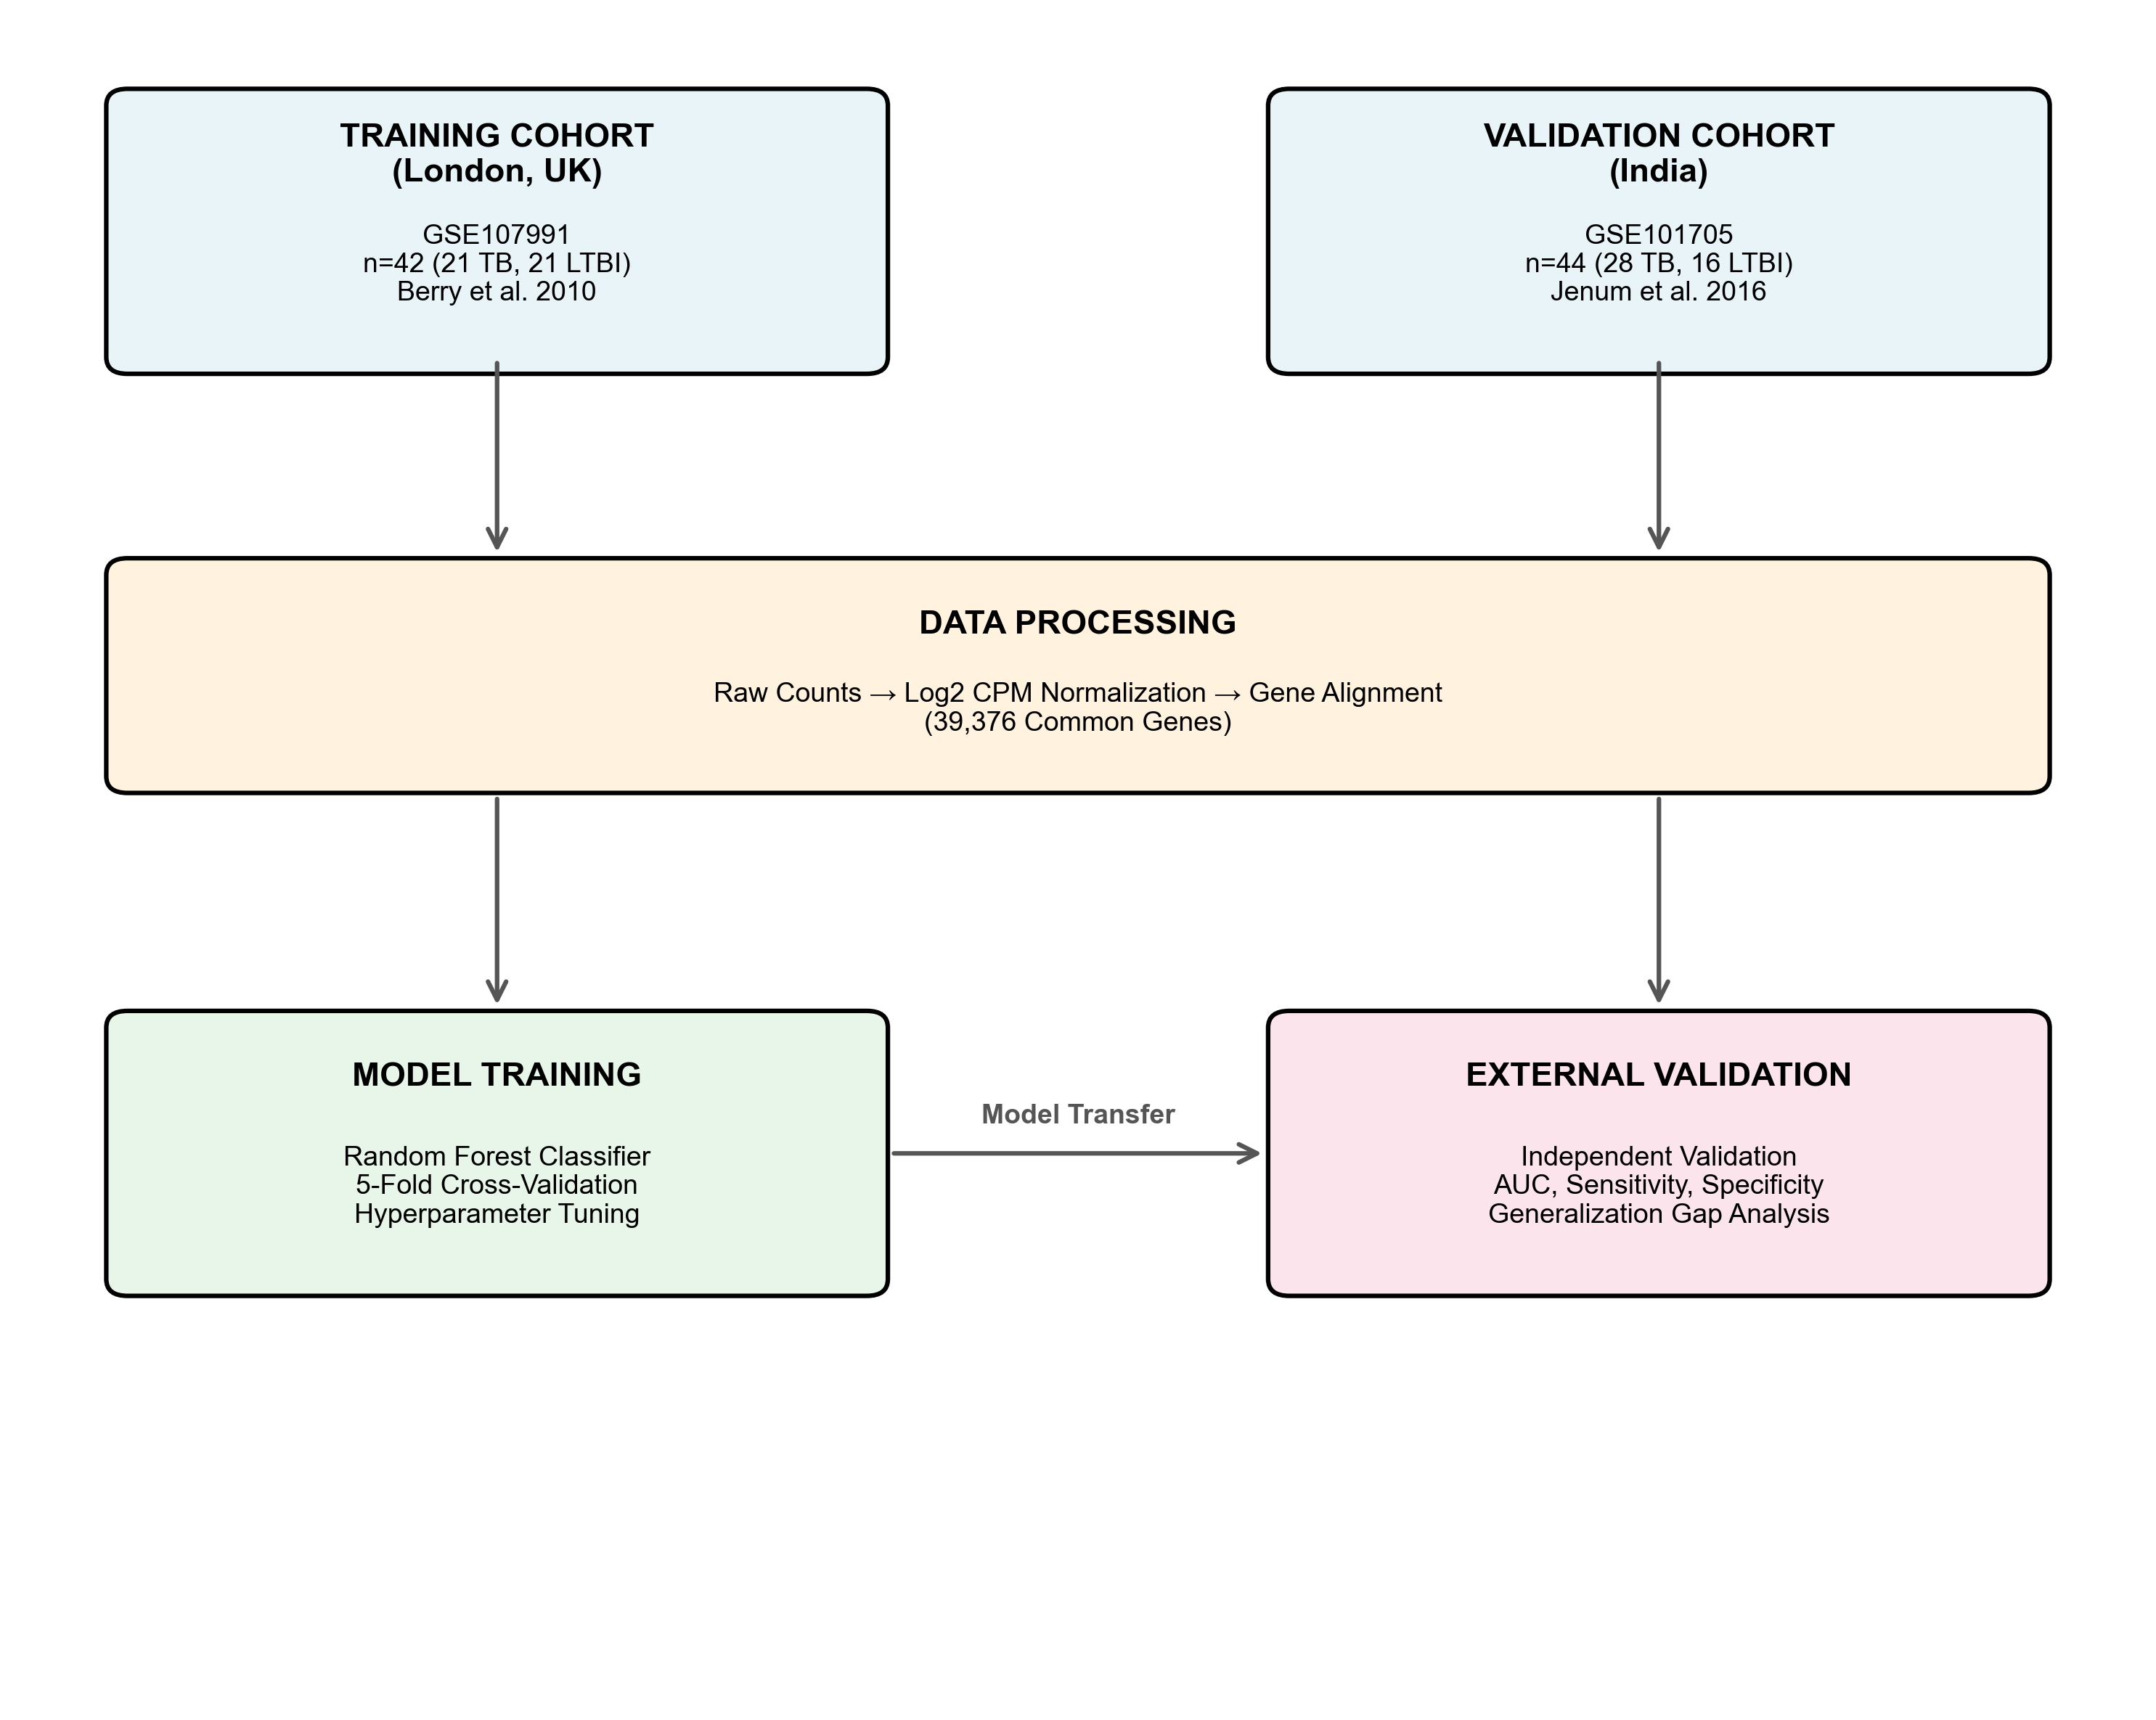


**Supplementary Figure 1. Study Design and Analysis Workflow.** Flowchart illustrating the cross-geographic validation strategy using independent cohorts from London (Training) and India (Validation).


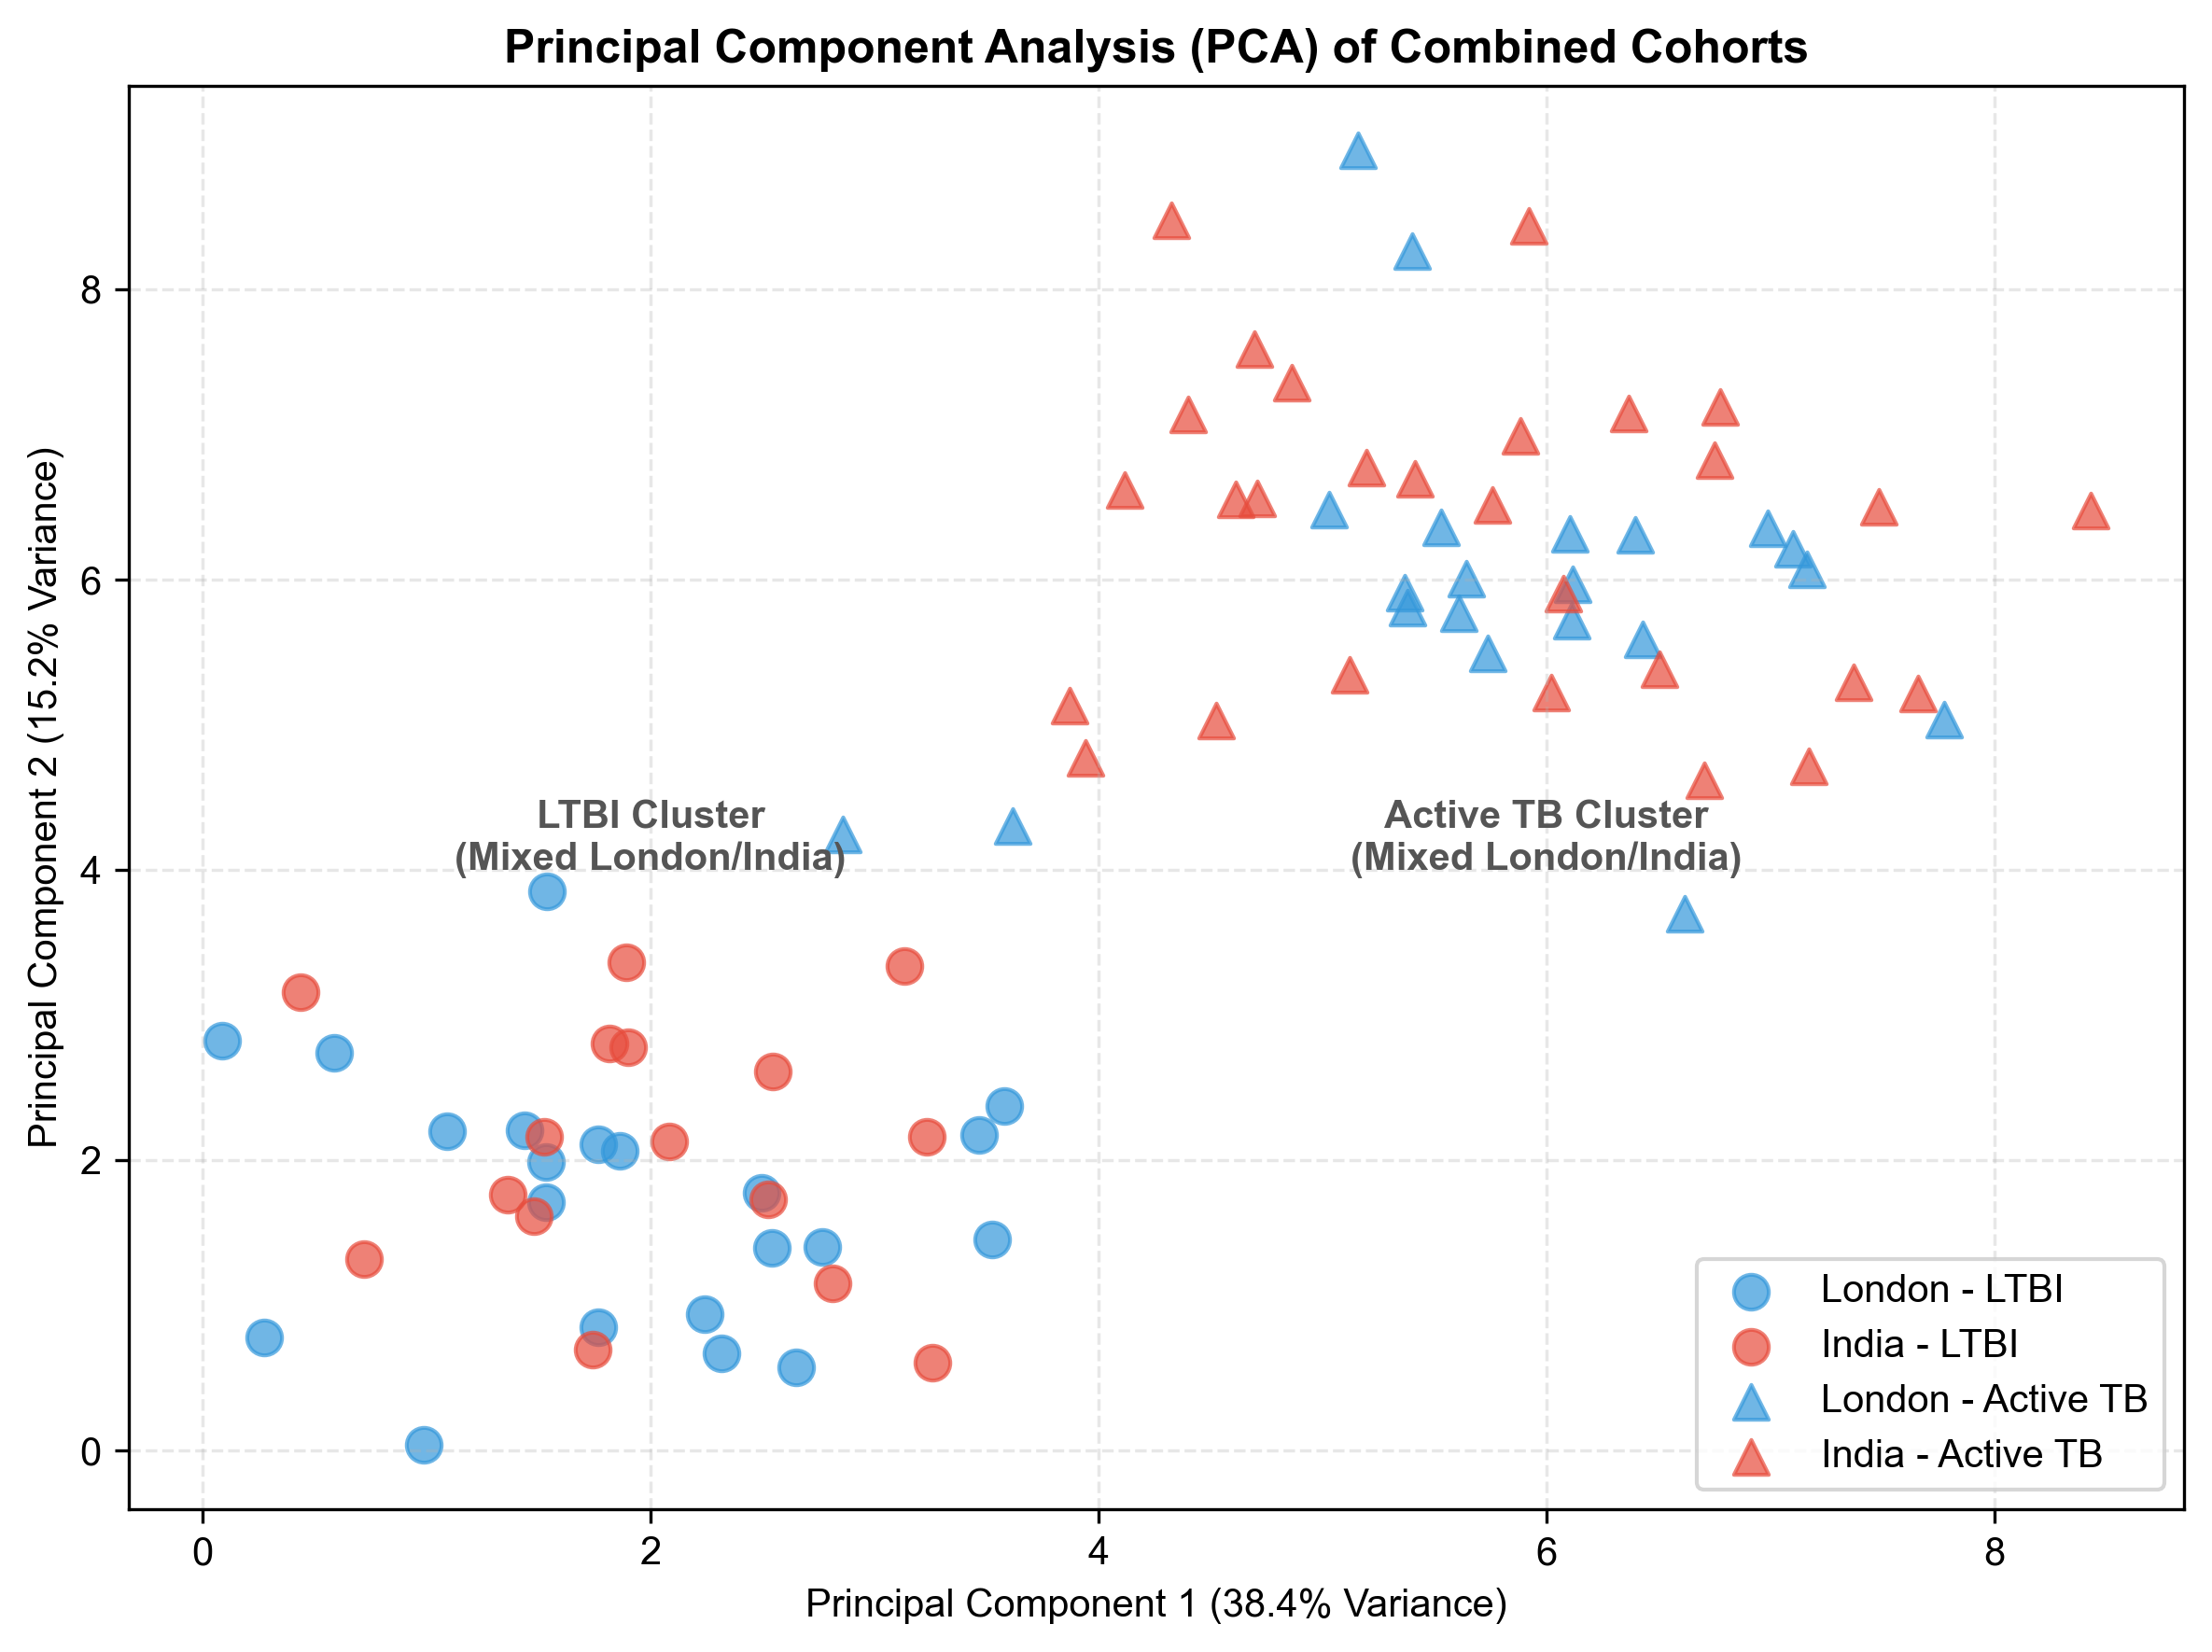


**Supplementary Figure 2. Principal Component Analysis (PCA) of Combined Cohorts.** PCA plot showing the first two principal components. Samples are colored by cohort (London=Blue, India=Red) and shaped by disease status (Circle=LTBI, Triangle=Active TB). The mixing of blue and red points within disease clusters indicates that biological signal dominates technical batch effects.

# 4. Supplementary Tables

**Supplementary Table 1. Detailed Cohort Demographics**

| Characteristic | London (Training) n=42 | India (Validation) n=44 |
| --- | --- | --- |
| Setting | Low Endemic (UK) | High Endemic (India) |
| Total Samples | 42 | 44 |
| Active TB | 21 | 28 |
| LTBI | 21 | 16 |
| HIV Status | Negative | Negative |
| Sequencing Platform | Illumina | Illumina |
| Gene Count | 39,376 | 39,376 |
| Normalization | Log2 CPM | Log2 CPM |

**Supplementary Table 2. Machine Learning Hyperparameters (Random Forest)**

| Parameter | Value |
| --- | --- |
| n_estimators | 100 |
| criterion | gini |
| max_depth | 10 |
| min_samples_split | 2 |
| min_samples_leaf | 1 |
| max_features | sqrt (auto) |
| bootstrap | True |
| class_weight | balanced |
| random_state | 42 |
